# Supplementary material
Source: PubMed Central journal article supplement (PMC1805096)

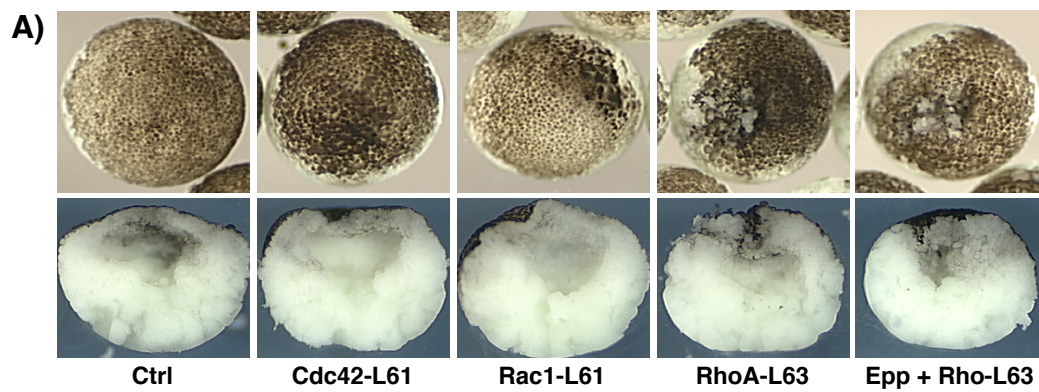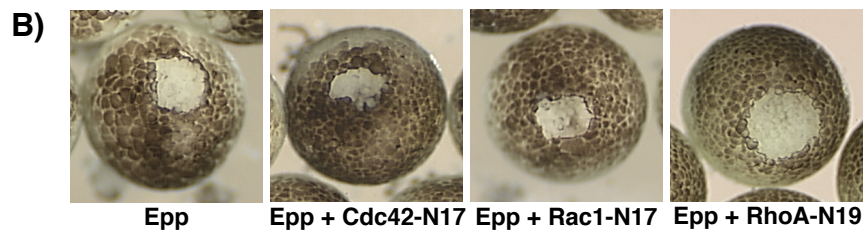

Supplement: mbc_E06-04-0294_1.pdf [file mbc_E06-04-0294_1.pdf]

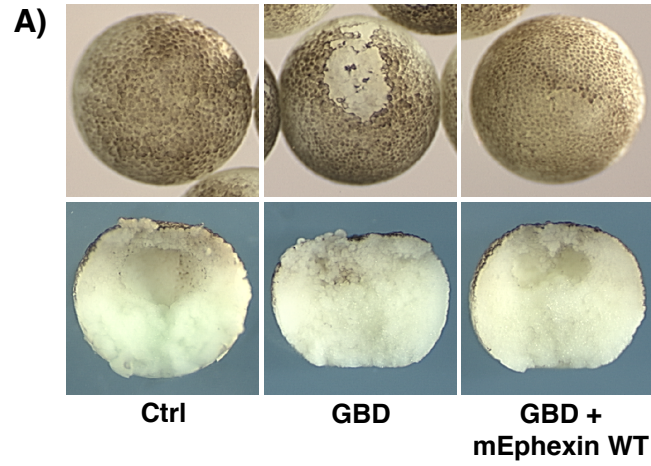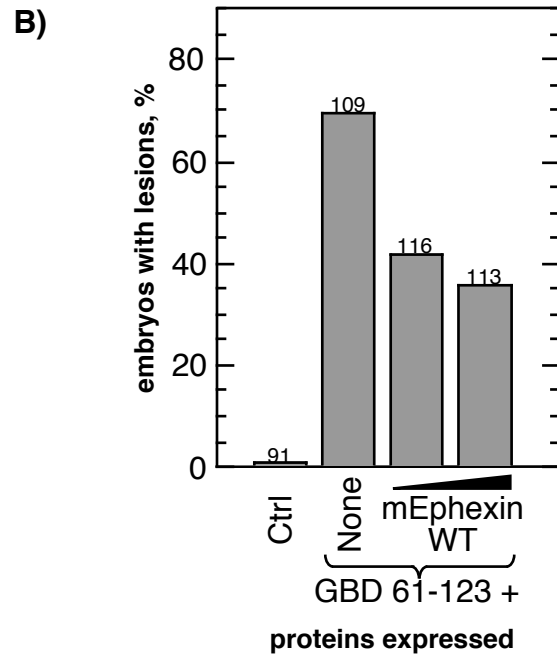

Supplement: mbc_E06-04-0294_2.pdf [file mbc_E06-04-0294_2.pdf]
